# Supplementary material
Source: publisher figshare collection journal article supplement (https://tandf.figshare.com/articles/dataset/_/3483392)
Supplement: Supplementary file 1 [file 2]

| Uploaded Variation | Location       | Allele | Gene    | Feature type      | Consequence               | Position in cDNA | Position in CDS | Position in protein | Amino acid change | Codon change |
|--------------------|----------------|--------|---------|-------------------|---------------------------|------------------|-----------------|---------------------|-------------------|--------------|
| rs11576243         | chr1:92101761  | C      | -       | -                 | intergenic_variant        | -                | -               | -                   | -                 | -            |
| rs4658257          | chr1:92129685  | G      | -       | -                 | intergenic_variant        | -                | -               | -                   | -                 | -            |
| rs284177           | chr1:92224698  | C      | TGFBR3  | Transcript        | intron_variant            | -                | -               | -                   | -                 | -            |
| rs284177           | chr1:92224698  | C      | TGFBR3  | Transcript        | intron_variant            | -                | -               | -                   | -                 | -            |
| rs284177           | chr1:92224698  | C      | TGFBR3  | Transcript        | intron_variant            | -                | -               | -                   | -                 | -            |
| rs284177           | chr1:92224698  | C      | TGFBR3  | Transcript        | intron_variant            | -                | -               | -                   | -                 | -            |
| rs284180           | chr1:92227848  | C      | TGFBR3  | Transcript        | intron_variant            | -                | -               | -                   | -                 | -            |
| rs284180           | chr1:92227848  | C      | TGFBR3  | Transcript        | intron_variant            | -                | -               | -                   | -                 | -            |
| rs284180           | chr1:92227848  | C      | TGFBR3  | Transcript        | intron_variant            | -                | -               | -                   | -                 | -            |
| rs284191           | chr1:92236048  | G      | TGFBR3  | Transcript        | intron_variant            | -                | -               | -                   | -                 | -            |
| rs284191           | chr1:92236048  | G      | TGFBR3  | Transcript        | intron_variant            | -                | -               | -                   | -                 | -            |
| rs284191           | chr1:92236048  | G      | TGFBR3  | Transcript        | intron_variant            | -                | -               | -                   | -                 | -            |
| rs284191           | chr1:92236048  | G      | TGFBR3  | Transcript        | intron_variant            | -                | -               | -                   | -                 | -            |
| rs284198           | chr1:92238167  | T      | TGFBR3  | Transcript        | intron_variant            | -                | -               | -                   | -                 | -            |
| rs284198           | chr1:92238167  | T      | TGFBR3  | Transcript        | intron_variant            | -                | -               | -                   | -                 | -            |
| rs284198           | chr1:92238167  | T      | TGFBR3  | Transcript        | intron_variant            | -                | -               | -                   | -                 | -            |
| rs284198           | chr1:92238167  | T      | TGFBR3  | Transcript        | intron_variant            | -                | -               | -                   | -                 | -            |
| rs4658265          | chr1:92240685  | T      | TGFBR3  | Transcript        | intron_variant            | -                | -               | -                   | -                 | -            |
| rs4658265          | chr1:92240685  | T      | TGFBR3  | Transcript        | intron_variant            | -                | -               | -                   | -                 | -            |
| rs4658265          | chr1:92240685  | T      | TGFBR3  | Transcript        | intron_variant            | -                | -               | -                   | -                 | -            |
| rs4658265          | chr1:92240685  | T      | TGFBR3  | Transcript        | intron_variant            | -                | -               | -                   | -                 | -            |
| rs6604053          | chr1:92244566  | A      | TGFBR3  | Transcript        | intron_variant            | -                | -               | -                   | -                 | -            |
| rs6604053          | chr1:92244566  | A      | TGFBR3  | Transcript        | intron_variant            | -                | -               | -                   | -                 | -            |
| rs6604053          | chr1:92244566  | A      | TGFBR3  | Transcript        | intron_variant            | -                | -               | -                   | -                 | -            |
| rs6604053          | chr1:92244566  | A      | TGFBR3  | Transcript        | intron_variant            | -                | -               | -                   | -                 | -            |
| rs6604053          | chr1:92244566  | A      | -       | RegulatoryFeature | regulatory_region_variant | -                | -               | -                   | -                 | -            |
| rs17131593         | chr1:92503338  | C      | EPHX4   | Transcript        | intron_variant            | -                | -               | -                   | -                 | -            |
| rs6662618          | chr1:92935411  | G      | GFI1    | Transcript        | downstream_gene_variant   | -                | -               | -                   | -                 | -            |
| rs6662618          | chr1:92935411  | G      | GFI1    | Transcript        | downstream_gene_variant   | -                | -               | -                   | -                 | -            |
| rs6662618          | chr1:92935411  | G      | GFI1    | Transcript        | downstream_gene_variant   | -                | -               | -                   | -                 | -            |
| rs11804321         | chr1:93009313  | C      | EVI5    | Transcript        | intron_variant            | -                | -               | -                   | -                 | -            |
| rs11804321         | chr1:93009313  | C      | EVI5    | Transcript        | intron_variant            | -                | -               | -                   | -                 | -            |
| rs11804321         | chr1:93009313  | C      | -       | RegulatoryFeature | regulatory_region_variant | -                | -               | -                   | -                 | -            |
| rs6698352          | chr1:170339511 | A      | -       | -                 | intergenic_variant        | -                | -               | -                   | -                 | -            |
| rs10797527         | chr1:234250281 | G      | SLC35F3 | Transcript        | intron_variant            | -                | -               | -                   | -                 | -            |
| rs10797527         | chr1:234250281 | G      | -       | RegulatoryFeature | regulatory_region_variant | -                | -               | -                   | -                 | -            |
| rs7095226          | chr10:2809279  | G      | -       | -                 | intergenic_variant        | -                | -               | -                   | -                 | -            |
| rs7914915          | chr10:6173416  | C      | -       | -                 | intergenic_variant        | -                | -               | -                   | -                 | -            |
| rs16936011         | chr10:35679866 | A      | CCNY    | Transcript        | intron_variant            | -                | -               | -                   | -                 | -            |
| rs16936011         | chr10:35679866 | A      | CCNY    | Transcript        | intron_variant            | -                | -               | -                   | -                 | -            |

| Uploaded Variation | Location       | Allele | Gene         | Feature type      | Consequence               | Position in cDNA | Position in CDS | Position in protein | Amino acid change | Codon change |
|--------------------|----------------|--------|--------------|-------------------|---------------------------|------------------|-----------------|---------------------|-------------------|--------------|
| rs16936011         | chr10:35679866 | A      | CCNY         | Transcript        | intron_variant            | -                | -               | -                   | -                 | -            |
| rs16936011         | chr10:35679866 | A      | CCNY         | Transcript        | intron_variant            | -                | -               | -                   | -                 | -            |
| rs16936011         | chr10:35679866 | A      | CCNY         | Transcript        | intron_variant            | -                | -               | -                   | -                 | -            |
| rs16936011         | chr10:35679866 | A      | -            | RegulatoryFeature | regulatory_region_variant | -                | -               | -                   | -                 | -            |
| rs10768177         | chr11:36125835 | G      | LDLRAD3      | Transcript        | intron_variant            | -                | -               | -                   | -                 | -            |
| rs10768177         | chr11:36125835 | G      | LDLRAD3      | Transcript        | intron_variant            | -                | -               | -                   | -                 | -            |
| rs10768177         | chr11:36125835 | G      | LDLRAD3      | Transcript        | intron_variant            | -                | -               | -                   | -                 | -            |
| rs10768177         | chr11:36125835 | G      | -            | RegulatoryFeature | regulatory_region_variant | -                | -               | -                   | -                 | -            |
| rs12865017         | chr13:46908398 | C      | -            | -                 | intergenic_variant        | -                | -               | -                   | -                 | -            |
| rs12865017         | chr13:46908398 | C      | -            | RegulatoryFeature | regulatory_region_variant | -                | -               | -                   | -                 | -            |
| rs1095070          | chr13:64450447 | A      | -            | -                 | intergenic_variant        | -                | -               | -                   | -                 | -            |
| rs2414428          | chr15:56007695 | C      | PRTG         | Transcript        | intron_variant            | -                | -               | -                   | -                 | -            |
| rs2414428          | chr15:56007695 | C      | -            | RegulatoryFeature | regulatory_region_variant | -                | -               | -                   | -                 | -            |
| rs4886649          | chr15:75328595 | C      | PPCDC        | Transcript        | intron_variant            | -                | -               | -                   | -                 | -            |
| rs4886649          | chr15:75328595 | C      | PPCDC        | Transcript        | intron_variant            | -                | -               | -                   | -                 | -            |
| rs4886649          | chr15:75328595 | C      | PPCDC        | Transcript        | intron_variant            | -                | -               | -                   | -                 | -            |
| rs4886649          | chr15:75328595 | C      | PPCDC        | Transcript        | intron_variant            | -                | -               | -                   | -                 | -            |
| rs4886649          | chr15:75328595 | C      | PPCDC        | Transcript        | intron_variant            | -                | -               | -                   | -                 | -            |
| rs4886649          | chr15:75328595 | C      | -            | RegulatoryFeature | regulatory_region_variant | -                | -               | -                   | -                 | -            |
| rs12447897         | chr16:87738888 | T      | KLHDC4       | Transcript        | downstream_gene_variant   | -                | -               | -                   | -                 | -            |
| rs12447897         | chr16:87738888 | T      | KLHDC4       | Transcript        | downstream_gene_variant   | -                | -               | -                   | -                 | -            |
| rs12447897         | chr16:87738888 | T      | KLHDC4       | Transcript        | downstream_gene_variant   | -                | -               | -                   | -                 | -            |
| rs12447897         | chr16:87738888 | T      | -            | RegulatoryFeature | regulatory_region_variant | -                | -               | -                   | -                 | -            |
| rs2970065          | chr17:16416867 | T      | -            | -                 | intergenic_variant        | -                | -               | -                   | -                 | -            |
| rs10512460         | chr17:32459020 | G      | ASIC2        | Transcript        | intron_variant            | -                | -               | -                   | -                 | -            |
| rs2597167          | chr17:46047656 | C      | CDK5RAP3     | Transcript        | upstream_gene_variant     | -                | -               | -                   | -                 | -            |
| rs2597167          | chr17:46047656 | C      | CDK5RAP3     | Transcript        | upstream_gene_variant     | -                | -               | -                   | -                 | -            |
| rs2597167          | chr17:46047656 | C      | CDK5RAP3     | Transcript        | upstream_gene_variant     | -                | -               | -                   | -                 | -            |
| rs2597167          | chr17:46047656 | C      | CDK5RAP3     | Transcript        | upstream_gene_variant     | -                | -               | -                   | -                 | -            |
| rs2597167          | chr17:46047656 | C      | CDK5RAP3     | Transcript        | upstream_gene_variant     | -                | -               | -                   | -                 | -            |
| rs2597167          | chr17:46047656 | C      | -            | RegulatoryFeature | regulatory_region_variant | -                | -               | -                   | -                 | -            |
| rs8066209          | chr17:59798591 | T      | BRIP1        | Transcript        | intron_variant            | -                | -               | -                   | -                 | -            |
| rs7214718          | chr17:65239455 | C      | HE LZ        | Transcript        | intron_variant            | -                | -               | -                   | -                 | -            |
| rs7214718          | chr17:65239455 | C      | LOC101928021 | Transcript        | upstream_gene_variant     | -                | -               | -                   | -                 | -            |
| rs7214718          | chr17:65239455 | C      | -            | RegulatoryFeature | regulatory_region_variant | -                | -               | -                   | -                 | -            |
| rs6501667          | chr17:71859152 | G      | -            | -                 | intergenic_variant        | -                | -               | -                   | -                 | -            |
| rs1987925          | chr17:71866651 | T      | -            | -                 | intergenic_variant        | -                | -               | -                   | -                 | -            |
| rs532804           | chr18:66067465 | G      | -            | -                 | intergenic_variant        | -                | -               | -                   | -                 | -            |
| rs8109892          | chr19:14842242 | T      | ZNF333       | Transcript        | 3_prime_UTR_variant       | 1308             | -               | -                   | -                 | -            |
| rs8109892          | chr19:14842242 | T      | ADGRE2       | Transcript        | downstream_gene_variant   | -                | -               | -                   | -                 | -            |
| rs8109892          | chr19:14842242 | T      | ADGRE2       | Transcript        | downstream_gene_variant   | -                | -               | -                   | -                 | -            |

[illegible]

| Uploaded Variation | Location       | Allele | Gene       | Feature type      | Consequence               | Position in cDNA | Position in CDS | Position in protein | Amino acid change | Codon change |
|--------------------|----------------|--------|------------|-------------------|---------------------------|------------------|-----------------|---------------------|-------------------|--------------|
| rs6550402          | chr3:20219885  | T      | SGO1       | Transcript        | intron_variant            | -                | -               | -                   | -                 | -            |
| rs6550402          | chr3:20219885  | T      | SGO1       | Transcript        | intron_variant            | -                | -               | -                   | -                 | -            |
| rs6550402          | chr3:20219885  | T      | SGO1-AS1   | Transcript        | intron_variant            | -                | -               | -                   | -                 | -            |
| rs7631044          | chr3:30730722  | C      | TGFBR2     | Transcript        | intron_variant            | -                | -               | -                   | -                 | -            |
| rs7631044          | chr3:30730722  | C      | TGFBR2     | Transcript        | intron_variant            | -                | -               | -                   | -                 | -            |
| rs7631044          | chr3:30730722  | C      | -          | RegulatoryFeature | regulatory_region_variant | -                | -               | -                   | -                 | -            |
| rs326255           | chr3:96201175  | A      | -          | -                 | intergenic_variant        | -                | -               | -                   | -                 | -            |
| rs587321           | chr3:114590028 | T      | ZBTB20     | Transcript        | intron_variant            | -                | -               | -                   | -                 | -            |
| rs587321           | chr3:114590028 | T      | ZBTB20     | Transcript        | intron_variant            | -                | -               | -                   | -                 | -            |
| rs587321           | chr3:114590028 | T      | ZBTB20     | Transcript        | intron_variant            | -                | -               | -                   | -                 | -            |
| rs587321           | chr3:114590028 | T      | ZBTB20-AS3 | Transcript        | upstream_gene_variant     | -                | -               | -                   | -                 | -            |
| rs17236537         | chr3:160275031 | A      | KPNA4      | Transcript        | intron_variant            | -                | -               | -                   | -                 | -            |
| rs743695           | chr4:2307574   | C      | ZFYVE28    | Transcript        | intron_variant            | -                | -               | -                   | -                 | -            |
| rs743695           | chr4:2307574   | C      | ZFYVE28    | Transcript        | intron_variant            | -                | -               | -                   | -                 | -            |
| rs743695           | chr4:2307574   | C      | ZFYVE28    | Transcript        | intron_variant            | -                | -               | -                   | -                 | -            |
| rs2660943          | chr4:58935943  | G      | -          | -                 | intergenic_variant        | -                | -               | -                   | -                 | -            |
| rs9312960          | chr5:204082    | A      | CCDC127    | Transcript        | downstream_gene_variant   | -                | -               | -                   | -                 | -            |
| rs9312960          | chr5:204082    | A      | -          | RegulatoryFeature | regulatory_region_variant | -                | -               | -                   | -                 | -            |
| rs1054174          | chr5:204952    | T      | CCDC127    | Transcript        | 3_prime_UTR_variant       | 1343             | -               | -                   | -                 | -            |
| rs9763161          | chr5:207618    | A      | CCDC127    | Transcript        | intron_variant            | -                | -               | -                   | -                 | -            |
| rs9763161          | chr5:207618    | A      | -          | RegulatoryFeature | regulatory_region_variant | -                | -               | -                   | -                 | -            |
| rs11133943         | chr5:246152    | C      | SDHA       | Transcript        | intron_variant            | -                | -               | -                   | -                 | -            |
| rs11133943         | chr5:246152    | C      | SDHA       | Transcript        | intron_variant            | -                | -               | -                   | -                 | -            |
| rs11133943         | chr5:246152    | C      | -          | RegulatoryFeature | regulatory_region_variant | -                | -               | -                   | -                 | -            |
| rs16900804         | chr5:305595    | C      | PDCD6      | Transcript        | intron_variant            | -                | -               | -                   | -                 | -            |
| rs16900804         | chr5:305595    | C      | PDCD6      | Transcript        | intron_variant            | -                | -               | -                   | -                 | -            |
| rs16900804         | chr5:305595    | C      | PDCD6      | Transcript        | intron_variant            | -                | -               | -                   | -                 | -            |
| rs16900804         | chr5:305595    | C      | PDCD6      | Transcript        | intron_variant            | -                | -               | -                   | -                 | -            |
| rs16900804         | chr5:305595    | C      | PDCD6      | Transcript        | intron_variant            | -                | -               | -                   | -                 | -            |
| rs16900804         | chr5:305595    | C      | AHRR       | Transcript        | intron_variant            | -                | -               | -                   | -                 | -            |
| rs16900804         | chr5:305595    | C      | AHRR       | Transcript        | intron_variant            | -                | -               | -                   | -                 | -            |
| rs11745733         | chr5:360739    | A      | AHRR       | Transcript        | intron_variant            | -                | -               | -                   | -                 | -            |
| rs11745733         | chr5:360739    | A      | AHRR       | Transcript        | intron_variant            | -                | -               | -                   | -                 | -            |
| rs11745733         | chr5:360739    | A      | -          | RegulatoryFeature | regulatory_region_variant | -                | -               | -                   | -                 | -            |
| rs6899226          | chr5:393377    | T      | AHRR       | Transcript        | intron_variant            | -                | -               | -                   | -                 | -            |
| rs6899226          | chr5:393377    | T      | AHRR       | Transcript        | intron_variant            | -                | -               | -                   | -                 | -            |
| rs6899226          | chr5:393377    | T      | -          | RegulatoryFeature | regulatory_region_variant | -                | -               | -                   | -                 | -            |
| rs10067993         | chr5:7281915   | G      | -          | -                 | intergenic_variant        | -                | -               | -                   | -                 | -            |
| rs3891746          | chr5:11702017  | A      | CTNND2     | Transcript        | intron_variant            | -                | -               | -                   | -                 | -            |
| rs3891746          | chr5:11702017  | A      | CTNND2     | Transcript        | intron_variant            | -                | -               | -                   | -                 | -            |
| rs3891746          | chr5:11702017  | A      | CTNND2     | Transcript        | intron_variant            | -                | -               | -                   | -                 | -            |

| Uploaded Variation | Location       | Allele | Gene         | Feature type      | Consequence               | Position in cDNA | Position in CDS | Position in protein | Amino acid change | Codon change |
|--------------------|----------------|--------|--------------|-------------------|---------------------------|------------------|-----------------|---------------------|-------------------|--------------|
| rs6880511          | chr5:124597571 | G      | LOC101927421 | Transcript        | intron_variant            | -                | -               | -                   | -                 | -            |
| rs4976609          | chr5:167863844 | A      | WWC1         | Transcript        | intron_variant            | -                | -               | -                   | -                 | -            |
| rs4976609          | chr5:167863844 | A      | WWC1         | Transcript        | intron_variant            | -                | -               | -                   | -                 | -            |
| rs4976609          | chr5:167863844 | A      | WWC1         | Transcript        | intron_variant            | -                | -               | -                   | -                 | -            |
| rs4976609          | chr5:167863844 | A      | -            | RegulatoryFeature | regulatory_region_variant | -                | -               | -                   | -                 | -            |
| rs594930           | chr6:114170427 | C      | -            | -                 | intergenic_variant        | -                | -               | -                   | -                 | -            |
| rs3808340          | chr7:962371    | G      | ADAP1        | Transcript        | upstream_gene_variant     | -                | -               | -                   | -                 | -            |
| rs3808340          | chr7:962371    | G      | ADAP1        | Transcript        | intron_variant            | -                | -               | -                   | -                 | -            |
| rs3808340          | chr7:962371    | G      | ADAP1        | Transcript        | intron_variant            | -                | -               | -                   | -                 | -            |
| rs3808340          | chr7:962371    | G      | ADAP1        | Transcript        | intron_variant            | -                | -               | -                   | -                 | -            |
| rs3808340          | chr7:962371    | G      | ADAP1        | Transcript        | intron_variant            | -                | -               | -                   | -                 | -            |
| rs3808340          | chr7:962371    | G      | -            | RegulatoryFeature | regulatory_region_variant | -                | -               | -                   | -                 | -            |
| rs6977682          | chr7:8269678   | C      | ICA1         | Transcript        | intron_variant            | -                | -               | -                   | -                 | -            |
| rs6977682          | chr7:8269678   | C      | ICA1         | Transcript        | intron_variant            | -                | -               | -                   | -                 | -            |
| rs6977682          | chr7:8269678   | C      | ICA1         | Transcript        | intron_variant            | -                | -               | -                   | -                 | -            |
| rs6977682          | chr7:8269678   | C      | ICA1         | Transcript        | intron_variant            | -                | -               | -                   | -                 | -            |
| rs6977682          | chr7:8269678   | C      | -            | RegulatoryFeature | regulatory_region_variant | -                | -               | -                   | -                 | -            |
| rs2877301          | chr7:44995327  | T      | -            | -                 | intergenic_variant        | -                | -               | -                   | -                 | -            |
| rs2877301          | chr7:44995327  | T      | -            | RegulatoryFeature | regulatory_region_variant | -                | -               | -                   | -                 | -            |
| rs6946581          | chr7:44998714  | A      | MYO1G        | Transcript        | downstream_gene_variant   | -                | -               | -                   | -                 | -            |
| rs6946581          | chr7:44998714  | A      | -            | RegulatoryFeature | regulatory_region_variant | -                | -               | -                   | -                 | -            |
| rs6976664          | chr7:45014304  | T      | MYO1G        | Transcript        | intron_variant            | -                | -               | -                   | -                 | -            |
| rs6976664          | chr7:45014304  | T      | -            | RegulatoryFeature | regulatory_region_variant | -                | -               | -                   | -                 | -            |
| rs7792895          | chr7:45141785  | T      | TBRG4        | Transcript        | intron_variant            | -                | -               | -                   | -                 | -            |
| rs7792895          | chr7:45141785  | T      | TBRG4        | Transcript        | intron_variant            | -                | -               | -                   | -                 | -            |
| rs7792895          | chr7:45141785  | T      | TBRG4        | Transcript        | intron_variant            | -                | -               | -                   | -                 | -            |
| rs7792895          | chr7:45141785  | T      | TBRG4        | Transcript        | intron_variant            | -                | -               | -                   | -                 | -            |
| rs7792895          | chr7:45141785  | T      | SNORA5A      | Transcript        | downstream_gene_variant   | -                | -               | -                   | -                 | -            |
| rs7792895          | chr7:45141785  | T      | SNORA5C      | Transcript        | downstream_gene_variant   | -                | -               | -                   | -                 | -            |
| rs7792895          | chr7:45141785  | T      | SNORA5B      | Transcript        | downstream_gene_variant   | -                | -               | -                   | -                 | -            |
| rs1524395          | chr7:54198501  | A      | -            | -                 | intergenic_variant        | -                | -               | -                   | -                 | -            |
| rs10229129         | chr7:103950365 | C      | -            | -                 | intergenic_variant        | -                | -               | -                   | -                 | -            |
| rs6979610          | chr7:138463724 | G      | ATP6V0A4     | Transcript        | upstream_gene_variant     | -                | -               | -                   | -                 | -            |
| rs6979610          | chr7:138463724 | G      | ATP6V0A4     | Transcript        | intron_variant            | -                | -               | -                   | -                 | -            |
| rs6979610          | chr7:138463724 | G      | ATP6V0A4     | Transcript        | intron_variant            | -                | -               | -                   | -                 | -            |
| rs11761588         | chr7:151094048 | C      | WDR86        | Transcript        | intron_variant            | -                | -               | -                   | -                 | -            |
| rs11761588         | chr7:151094048 | C      | WDR86        | Transcript        | intron_variant            | -                | -               | -                   | -                 | -            |
| rs11761588         | chr7:151094048 | C      | WDR86        | Transcript        | intron_variant            | -                | -               | -                   | -                 | -            |
| rs11761588         | chr7:151094048 | C      | WDR86        | Transcript        | intron_variant            | -                | -               | -                   | -                 | -            |
| rs11761588         | chr7:151094048 | C      | -            | RegulatoryFeature | regulatory_region_variant | -                | -               | -                   | -                 | -            |
| rs13257816         | chr8:5181443   | A      | -            | -                 | intergenic_variant        | -                | -               | -                   | -                 | -            |

| Uploaded Variation | Location       | Allele | Gene      | Feature type      | Consequence               | Position in cDNA | Position in CDS | Position in protein | Amino acid change | Codon change |
|--------------------|----------------|--------|-----------|-------------------|---------------------------|------------------|-----------------|---------------------|-------------------|--------------|
| rs1436149          | chr8:23732888  | T      | -         | -                 | intergenic_variant        | -                | -               | -                   | -                 | -            |
| rs28921387         | chr8:107682407 | A      | OXR1      | Transcript        | intron_variant            | -                | -               | -                   | -                 | -            |
| rs28921387         | chr8:107682407 | A      | OXR1      | Transcript        | intron_variant            | -                | -               | -                   | -                 | -            |
| rs28921387         | chr8:107682407 | A      | OXR1      | Transcript        | intron_variant            | -                | -               | -                   | -                 | -            |
| rs28921387         | chr8:107682407 | A      | OXR1      | Transcript        | intron_variant            | -                | -               | -                   | -                 | -            |
| rs28921387         | chr8:107682407 | A      | -         | RegulatoryFeature | regulatory_region_variant | -                | -               | -                   | -                 | -            |
| rs10975176         | chr9:5551385   | A      | PDCD1LG2  | Transcript        | intron_variant            | -                | -               | -                   | -                 | -            |
| rs3010671          | chr9:81078138  | A      | -         | -                 | intergenic_variant        | -                | -               | -                   | -                 | -            |
| rs11137862         | chr9:81442685  | C      | -         | -                 | intergenic_variant        | -                | -               | -                   | -                 | -            |
| rs12378461         | chr9:81474084  | A      | -         | -                 | intergenic_variant        | -                | -               | -                   | -                 | -            |
| rs11137922         | chr9:81493973  | T      | -         | -                 | intergenic_variant        | -                | -               | -                   | -                 | -            |
| rs10819528         | chr9:132260350 | G      | LINC00963 | Transcript        | intron_variant            | -                | -               | -                   | -                 | -            |
| rs10819528         | chr9:132260350 | G      | -         | RegulatoryFeature | regulatory_region_variant | -                | -               | -                   | -                 | -            |
